# Supplementary material for: Acute effects of MDMA and LSD co-administration in a double-blind placebo-controlled study in healthy participants
Source: PubMed Central journal article supplement (PMC10584820; doi:10.1038/s41386-023-01609-0), 2023-05-31
Supplement: 41386_2023_1609_MOESM2_ESM.pdf [file 41386_2023_1609_MOESM2_ESM.pdf]

**Enrollment**

Assessed for eligibility (n=35)

Excluded (n=10)  
• Not meeting inclusion criteria (n=9)  
• Withdrawal of consent (n=1)

Randomized (n=25)

Drop out (n=1) before the first Session

**Allocation**

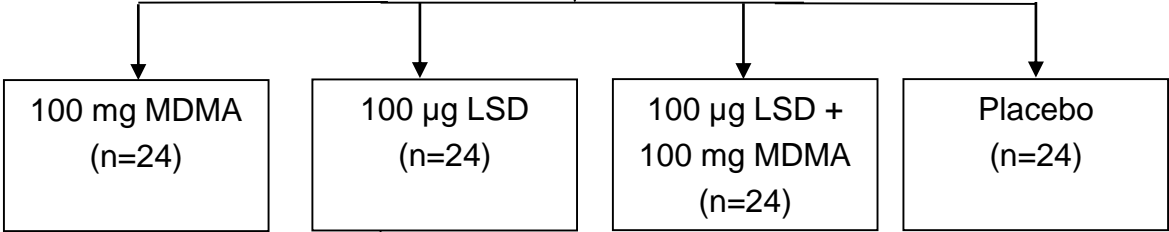

Participants completed the study (n=24)

**Analysis**

Analysed (n=24)  
• Excluded from analysis (n=0)
